# Supplementary material for: Improving isoprenol productionviasystematic CRISPRi screening in engineeredEscherichia coli
Source: Royal Society of Chemistry journal article supplement (doi:10.1039/d2gc02255a), 2022-01-01
Supplement: d2gc02255a1.pdf [file d2gc02255a1.pdf]

Electronic Supplementary Information for

**Improving isoprenol production via systematic CRISPRi screening in engineered**

***Escherichia coli***

Jian Wang<sup>1</sup>, Tian Jiang<sup>1</sup>, Sierra Milligan<sup>1</sup>, Jianli Zhang<sup>1</sup>, Chenyi Li<sup>1</sup>, Yajun Yan<sup>1,\*</sup>

<sup>1</sup>School of Chemical, Materials and Biomedical Engineering, College of Engineering, The University of Georgia, Athens, GA 30602, USA.

Jian Wang and Tian Jiang contributed equally to this work.

\*Corresponding author:

Yajun Yan

Address: 2040E Interdisciplinary STEM Research Building 1, 302 East Campus Road, Athens, GA 30602, USA

E-mail: [yajunyan@uga.edu](mailto:yajunyan@uga.edu); telephone: +1-706-542-8293

**Table S1. Sequences of sgRNAs used in this study**

| Name          | Sequence                                                                                                                                               |
|---------------|--------------------------------------------------------------------------------------------------------------------------------------------------------|
| <i>sgaphA</i> | TAGAGCGAACAATAAGCAAAGTTTTAGAGCTAGAAATAGCAAG<br>TTAAAATAAGGCTAGTCCGttatcaactgaaaaagtgaccgagtcggtgcttttt<br>CGCTCCAGGCTCCCAGCACAGTTTTAGAGCTAGAAATAGCAAGT |
| <i>sgyihX</i> | TAAAATAAGGCTAGTCCGttatcaactgaaaaagtgaccgagtcggtgcttttt<br>AACTATCCCTGCCACAGCTGGTTTTAGAGCTAGAAATAGCAAGT                                                 |
| <i>sgagp</i>  | TAAAATAAGGCTAGTCCGttatcaactgaaaaagtgaccgagtcggtgcttttt<br>ACGTGGTTGGTTGTACGTTTGTTTTAGAGCTAGAAATAGCAAGT                                                 |
| <i>sgybiV</i> | TAAAATAAGGCTAGTCCGttatcaactgaaaaagtgaccgagtcggtgcttttt<br>GGTGTGATCGGGCAGCAGAAGTTTTAGAGCTAGAAATAGCAAG                                                  |
| <i>sgyidA</i> | TTAAAATAAGGCTAGTCCGttatcaactgaaaaagtgaccgagtcggtgcttttt<br>CTAAATCAGACGCAACAACCGTTTTAGAGCTAGAAATAGCAAG                                                 |
| <i>sgyigL</i> | TTAAAATAAGGCTAGTCCGttatcaactgaaaaagtgaccgagtcggtgcttttt<br>GTCACAGGGGTAAACAGTAAGTTTTAGAGCTAGAAATAGCAAG                                                 |
| <i>sgphoA</i> | TTAAAATAAGGCTAGTCCGttatcaactgaaaaagtgaccgagtcggtgcttttt<br>CCGAGATGCGCCCCAAAGGCGTTTTAGAGCTAGAAATAGCAAG                                                 |
| <i>sgyigB</i> | TTAAAATAAGGCTAGTCCGttatcaactgaaaaagtgaccgagtcggtgcttttt<br>CATAAACCGCTCACGTTATGTTTTAGAGCTAGAAATAGCAAGT                                                 |
| <i>sgybjI</i> | TAAAATAAGGCTAGTCCGttatcaactgaaaaagtgaccgagtcggtgcttttt<br>GAAAAATACCGCTTCTATCCGTTTTAGAGCTAGAAATAGCAAGT                                                 |
| <i>sgyieH</i> | TAAAATAAGGCTAGTCCGttatcaactgaaaaagtgaccgagtcggtgcttttt<br>ACGCAAGCAACGGTAACGTGGTTTTAGAGCTAGAAATAGCAAG                                                  |
| <i>sgnudJ</i> | TTAAAATAAGGCTAGTCCGttatcaactgaaaaagtgaccgagtcggtgcttttt<br>AATGTAACGGGCAGGTTGTCGTTTTAGAGCTAGAAATAGCAAG                                                 |
| <i>sgnudF</i> | TTAAAATAAGGCTAGTCCGttatcaactgaaaaagtgaccgagtcggtgcttttt<br>TGCAGCAAGAATCTGACGCGTTTTAGAGCTAGAAATAGCAAG                                                  |
| <i>sghxpB</i> | TTAAAATAAGGCTAGTCCGttatcaactgaaaaagtgaccgagtcggtgcttttt<br>ACGCCGTTCTACCGCAGGCGTTTTAGAGCTAGAAATAGCAAGT                                                 |
| <i>sghxpA</i> | TAAAATAAGGCTAGTCCGttatcaactgaaaaagtgaccgagtcggtgcttttt                                                                                                 |
| <i>sgnudI</i> | CACCATCATTTTGAATCAAAGTTTTAGAGCTAGAAATAGCAAGT                                                                                                           |

TAAAATAAGGCTAGTCCGttatcaactgaaaaagtggcaccgagtcggtgcttttt  
AGTTCAGGGGTTTCGGTTAAGTTTTAGAGCTAGAAATAGCAAGT  
*sgotsB* TAAAATAAGGCTAGTCCGttatcaactgaaaaagtggcaccgagtcggtgcttttt  
AATCATCAAGCGTCAGGCTAGTTTTAGAGCTAGAAATAGCAAG  
*sgnudL* TAAAATAAGGCTAGTCCGttatcaactgaaaaagtggcaccgagtcggtgcttttt  
TACCGACATTGCCGGTTGCGGTTTTAGAGCTAGAAATAGCAAGT  
*sgyggV* TAAAATAAGGCTAGTCCGttatcaactgaaaaagtggcaccgagtcggtgcttttt  
TTCAAAATCAGTTTTAGAGCTAGAAATAGCAAGTTAAAATAAG  
*sgaccA10-cds1* GCTAGTCCGttatcaactgaaaaagtggcaccgagtcggtgcttttt  
GTGTCGATAAGTTTTAGAGCTAGAAATAGCAAGTTAAAATAAG  
*sgaccA10-cds2* GCTAGTCCGttatcaactgaaaaagtggcaccgagtcggtgcttttt  
ACCCTGTCCAGTTTTAGAGCTAGAAATAGCAAGTTAAAATAAG  
*sgfabD10-cds1* GCTAGTCCGttatcaactgaaaaagtggcaccgagtcggtgcttttt  
CCTTCCGGTAGTTTTAGAGCTAGAAATAGCAAGTTAAAATAAGG  
*sgfabD10-cds2* CTAGTCCGttatcaactgaaaaagtggcaccgagtcggtgcttttt  
GCACTTGTTTCGTTTTAGAGCTAGAAATAGCAAGTTAAAATAAGG  
*sgfabH10-cds1* CTAGTCCGttatcaactgaaaaagtggcaccgagtcggtgcttttt  
ACGTATTGATGTTTTAGAGCTAGAAATAGCAAGTTAAAATAAG  
*sgfabH10-cds2* GCTAGTCCGttatcaactgaaaaagtggcaccgagtcggtgcttttt  
TTAAACAAATCTAAcatTGGGTTTTAGAGCTAGAAATAGCAAGTT  
*sgmarC* AAAATAAGGCTAGTCCGttatcaactgaaaaagtggcaccgagtcggtgcttttt  
CCCCCTCCCTCGCGCTGGAAGTTTTAGAGCTAGAAATAGCAAGT  
*sgastE* TAAAATAAGGCTAGTCCGttatcaactgaaaaagtggcaccgagtcggtgcttttt  
TACGCGATGAGGATCATTCCGTTTTAGAGCTAGAAATAGCAAGT  
*sgygiH* TAAAATAAGGCTAGTCCGttatcaactgaaaaagtggcaccgagtcggtgcttttt  
ACGGCTTTATCGATAAGAAGTTTTAGAGCTAGAAATAGCAAG  
*sgyibT* TAAAATAAGGCTAGTCCGttatcaactgaaaaagtggcaccgagtcggtgcttttt  
CCATTAAGCCTTTACCAAAAAGTTTTAGAGCTAGAAATAGCAAGT  
*sgyghW* TAAAATAAGGCTAGTCCGttatcaactgaaaaagtggcaccgagtcggtgcttttt  
TCCAGTATCAACACGCCTTTGTTTTAGAGCTAGAAATAGCAAGT  
*sgybjC* TAAAATAAGGCTAGTCCGttatcaactgaaaaagtggcaccgagtcggtgcttttt

---
